## Corrigendum

# A novel requirement for DROSHA in maintenance of mammalian CG methylation

**Athanasia Stathopoulou<sup>1</sup>, Jyoti B. Chhetri<sup>1</sup>, John C. Ambrose<sup>2</sup>, Pierre-Olivier Estève<sup>3</sup>, Lexiang Ji<sup>4</sup>, Hediye Erdjument-Bromage<sup>5</sup>, Guoqiang Zhang<sup>3</sup>, Thomas A. Neubert<sup>5</sup>, Sriharsa Pradhan<sup>3</sup>, Javier Herrero<sup>2</sup>, Robert J. Schmitz<sup>4,6</sup> and Steen K.T. Ooi<sup>1,\*</sup>**

<sup>1</sup>Department of Cancer Biology, UCL Cancer Institute, London WC1E 6BT, UK, <sup>2</sup>Bill Lyons Informatics Centre, UCL Cancer Institute, London WC1E 6BT, UK, <sup>3</sup>New England Biolabs, 240 Country Road, Ipswich, MA 01938, USA, <sup>4</sup>Institute of Bioinformatics, University of Georgia, 120 East Green Street, Athens, GA 30602, USA, <sup>5</sup>Department of Biochemistry and Molecular Pharmacology, Skirball Institute, NYU School of Medicine, New York, NY 10016, USA and <sup>6</sup>Department of Genetics, University of Georgia, 120 East Green Street, Athens, GA 30602, USA

*Nucleic Acids Res* (2017). doi: 10.1093/nar/gkx695

The name of Hediye Erdjument-Bromage was misspelled in the original version of this paper. This has now been corrected online and in print.

---

\*To whom correspondence should be addressed. Tel: +44 2076 790717; Fax: +44 2076 796817; Email: s.ooi@ucl.ac.uk
